# Supplementary material
Source: PubMed Central journal article supplement (PMC2528090)
Supplement: pp.108.123653_1.pdf [file pp.108.123653_1.pdf]

**Supplemental Table 1. Primers used for construct preparation**

| Primers | Primer sequences                           | Genes/Fragments                 | Restriction sites |
|---------|--------------------------------------------|---------------------------------|-------------------|
| P1      | AATTGGCGCGCCATGGATCCATGGAT<br>GGGCAGCCAGCC | <i>HvWRKY38</i>                 | AscI              |
| P2      | TAAGGCGCGCCTTAATTGATGTCCCT                 | <i>HvWRKY38</i>                 | AscI              |
| P3      | ATGGCGCGCCATGTACCGGGTGAAG<br>AG            | <i>HvGAMYB</i>                  | AscI              |
| P4      | GAGGCGCGCCTCATTGAATTCCTCC<br>GAC           | <i>HvGAMYB</i>                  | AscI              |
| P5      | TATGGCGCGCCATGGAGGAAGTGTTT<br>TCG          | <i>BPBF</i>                     | AscI              |
| P6      | TTAGGCGCGCCTTACATCAGGGAGGT<br>GCTG         | <i>BPBF</i>                     | AscI              |
| P7      | ATTGGCGCGCCATGACATATGGAGG<br>AGAGAG        | <i>SAD</i>                      | AscI              |
| P8      | ATTGGCGCGCCGGTCGACCTACCACG<br>AGC          | <i>SAD</i>                      | AscI              |
| P9      | TATTGCTTAGCTCTCGCCGACCAGGG                 | <i>HvWRKY38 RNAi</i>            | BspI              |
| P10     | TTAAGCTAAGCGACTGCATTATCCTA<br>G            | <i>HvWRKY38 RNAi</i>            | Bsu36I            |
| P11     | CGCTGTAGCTCCGACTCTCGAGCCGC<br>AACCTCAGGGTC | <i>HvWRKY38 LZ<br/>Mutant 1</i> |                   |
| P12     | CCCTGAGCATCTCGCCATGGCGCCGG<br>TTCTCCTCG    | <i>HvWRKY38 LZ<br/>Mutant 2</i> |                   |
| P13     | ATTGGCGCGCCATGCAATGGCGCAA<br>GTAC          | <i>HvWRKY38<br/>C-terminal</i>  | AscI              |
| P14     | TTAGGCGCGCCTTAATTGATGTCCCT<br>GGTC         | <i>HvWRKY38<br/>C-terminal</i>  | AscI              |

P1 to P8 are primers for preparation of effector constructs. P9 and P10 are primers for preparation of *HvWRKY38 RNAi* construct. P11 to P15 are primers for *HvWRKY38* mutagenesis studies. P16 and P17 are primers for preparation of *HvWRKY38* C-terminal region.

## A Reporter construct

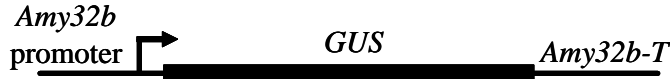

## Effector constructs

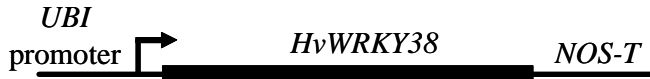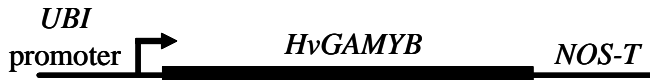

**B**

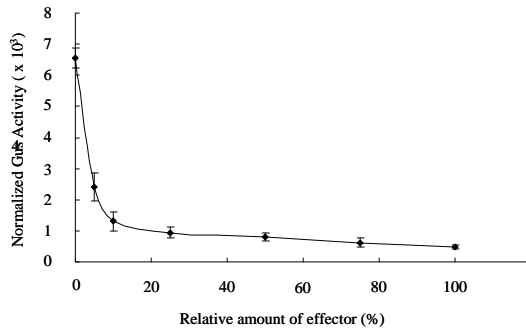

**C**

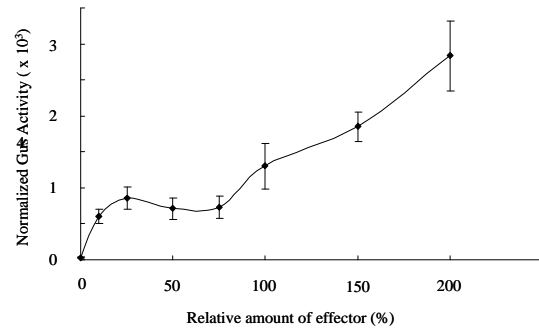

## Supplemental Figure 1. Functional interactions between HvWRKY38 and HvGAMYB.

A, Schematic diagrams of reporter and effector constructs used in the co-bombardment experiment. B, Varied amounts of *UBI-HvWRKY38* (from 0% to 100% relative to the reporter construct) were co-bombarded into barley aleurone cells with a constant amount of *UBI-HvGAMYB* (100%), *Amy32b-GUS* (100%), and the internal construct. The relative amount of *UBI-HvWRKY38* is indicated as a percentage compared to the amount of reporter. Each data point indicates the mean  $\pm$  SE of four replicates.
